# Supplementary material
Source: PubMed Central journal article supplement (PMC5766903)
Supplement: 10.1074_M117.801019_jbc.M117.801019-4.pdf [file 10.1074_M117.801019_jbc.M117.801019-4.pdf]

Role of salt bridges in the dimer interface of 14-3-3 $\zeta$  in dimer dynamics, N-terminal  $\alpha$ -helical order and molecular chaperone activity.

**Joanna M. Woodcock<sup>1\*</sup>, Katy L. Goodwin<sup>2\*</sup>, Jarrod J. Sandow<sup>3\*</sup>, Carl Coolen<sup>1</sup>, Matthew A. Perugini<sup>4</sup>, Andrew I. Webb<sup>3</sup>, Stuart M. Pitson<sup>1#</sup>, Angel F. Lopez<sup>1#</sup> and John A. Carver<sup>5#</sup>**

Supplementary Legend.

Movies S1, S2 and S3 demonstrate rotating ribbon diagrams of comparative HDX of D21N compared with wild type 14-3-3 $\zeta$  (PDB model:1QJB) inferred for individual residues at the three different time points (S1, 1 minute; S2, 10 minutes; and S3, 60 minutes) and expressed using heat-map coloring as defined in Figure 7B.
